# Supplementary material for: Construction of nitrogen-doped graphene quantum dots-BiVO4/g-C3N4Z-scheme photocatalyst and enhanced photocatalytic degradation of antibiotics under visible light
Source: Royal Society of Chemistry journal article supplement (doi:10.1039/c6ra07589d), 2016-01-01
Supplement: c6ra07589d1.pdf [file c6ra07589d1.pdf]

**Construction of Nitrogen Doped Graphene Quantum  
Dots-BiVO<sub>4</sub>/g-C<sub>3</sub>N<sub>4</sub> Z-scheme Photocatalyst and Enhanced  
Photocatalytic Degradation of Antibiotics under Visible  
Light**

*Ming Yan<sup>a</sup>, Fangfang Zhu<sup>b</sup>, Wei Gu<sup>b</sup>, Lin Sun<sup>b</sup>, Weidong Shi<sup>b,\*</sup>, Yinqun Hua<sup>a,\*</sup>*

*<sup>a</sup> School of Material Science and Engineering, Jiangsu University, Zhenjiang 212013,  
China*

*<sup>b</sup> School of Chemistry and Chemical Engineering, Jiangsu University, Zhenjiang  
212013, China*

*Corresponding Author\**

E-mail: swd1978@ujs.edu.cn

Telephone Number: +86-511-88791800; fax: +86 0511-88791800

The singlet oxygen reactive specie evolved in the process of photocatalytic reaction was investigated with the electron spin resonance (ESR) technique using 2,2,6,6-tetramethyl-4-piperidone (4-oxo-TMP) as a singlet oxygen trapping agent. It can be observed from Figure S5, there is no ESR signals obtained on irradiation of 5%NGQDs-Bi/2CN in aqueous solution in the presence of both 4-oxo-TMP, which suggested that there was no singlet oxygen generation in the reaction process [1-2].

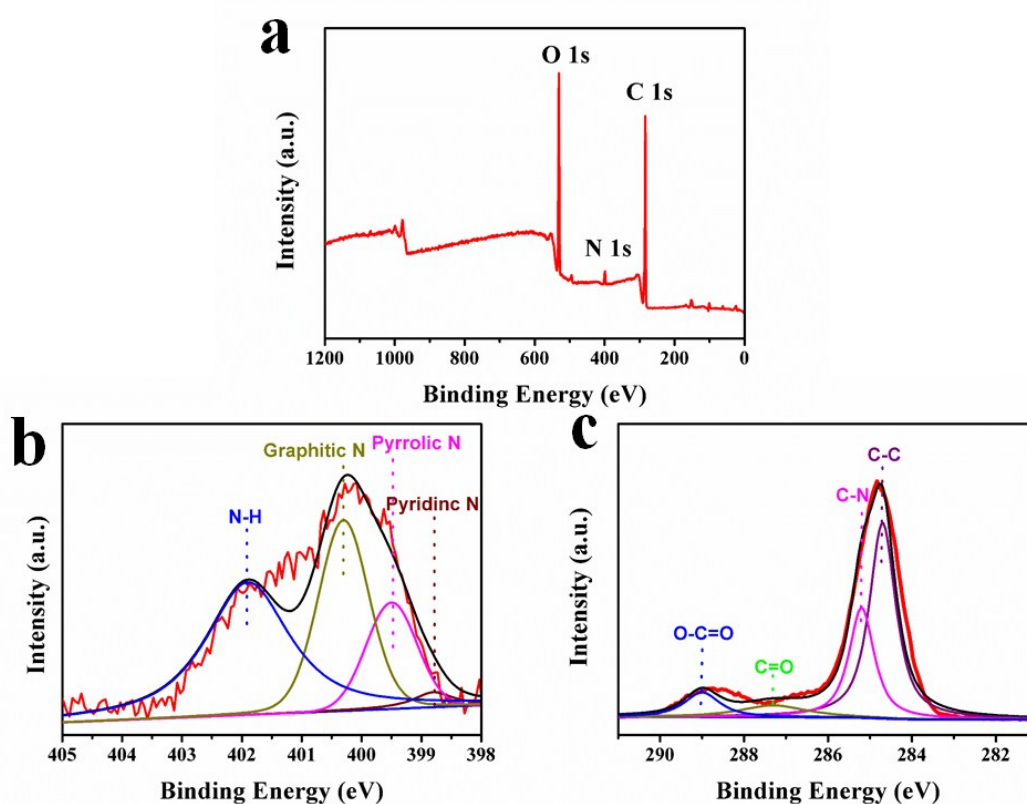

**Figure S1.** (a) XPS spectra of the as-prepared NGQDs: survey; (b) N 1s and (c) C 1s.

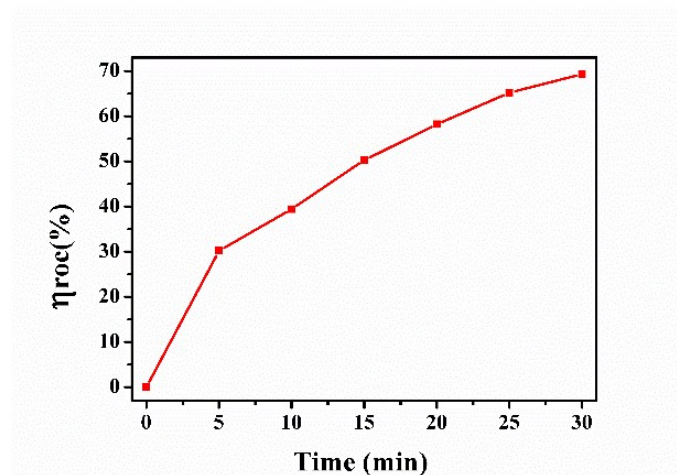

**Fig. S2.** The TOC removal rate of 5%NGQDs-Bi/2CN sample for degradation of TC under visible light.

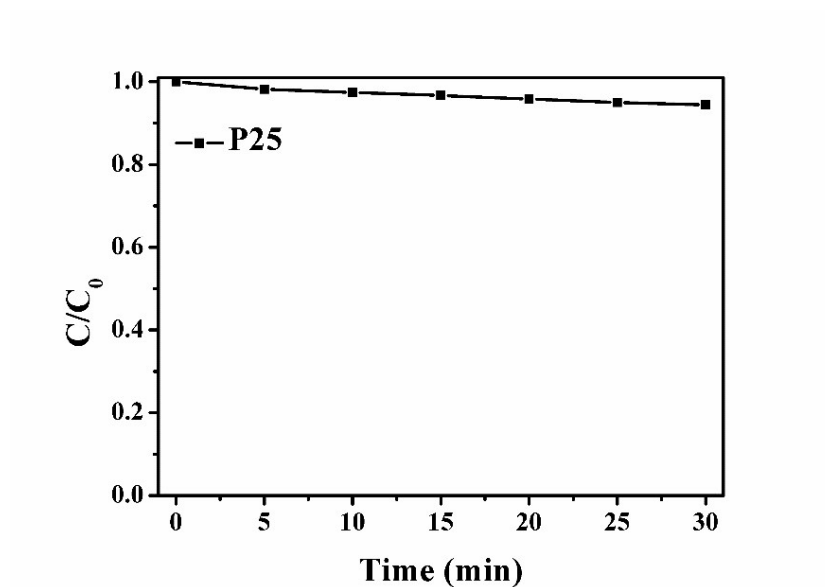

**Figure S3.** Photocatalytic degradation of TC with P25.

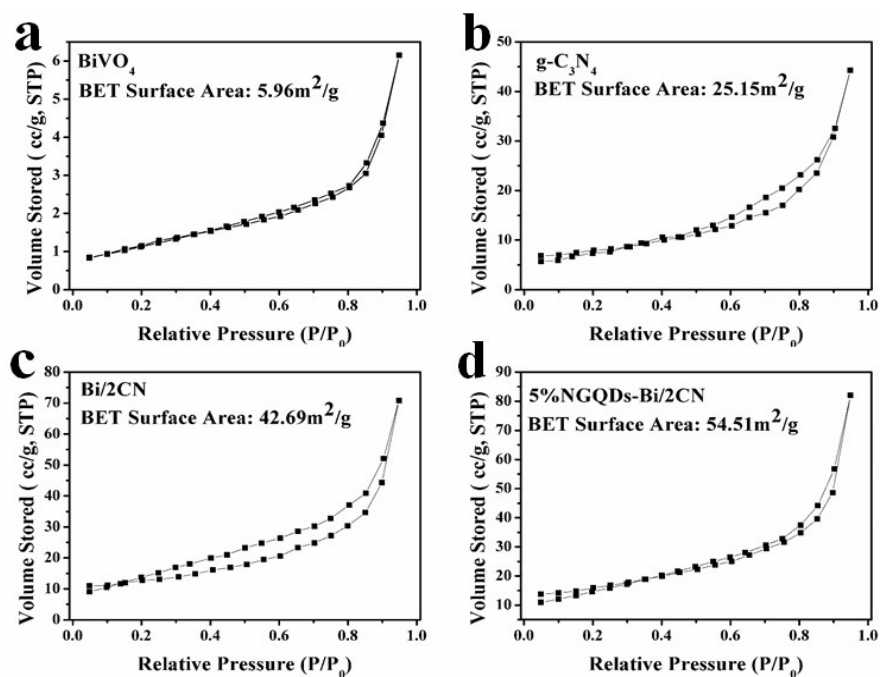

**Figure S4.** Nitrogen adsorption-desorption isotherm and BET surface areas of as-prepared samples.

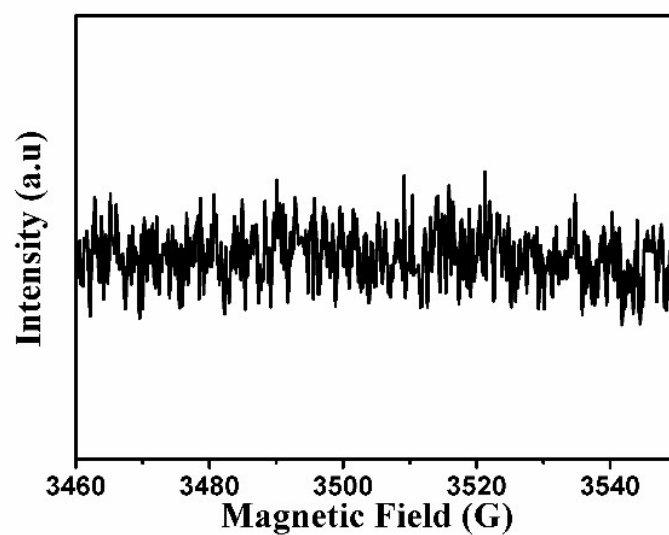

**Figure S5.** ESR spectra in aqueous dispersion of 5%NGQDs- Bi/2CN samples for singlet oxygen

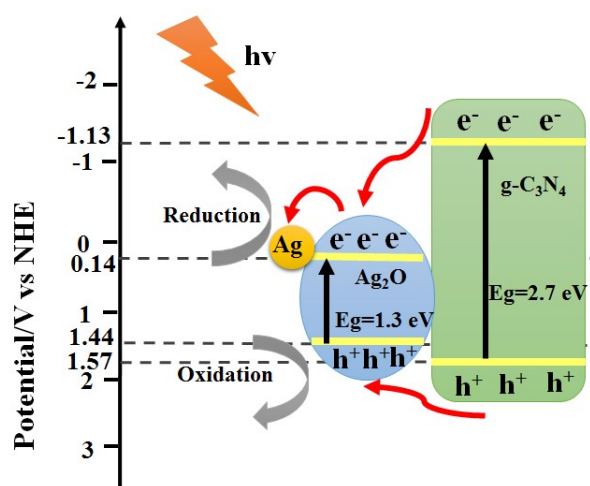

**Figure S6.** Schematic of the separation and transfer of photogenerated charges in the  $\text{Ag}_2\text{O}/\text{Ag}/\text{g-C}_3\text{N}_4$  composites.

#### References:

- [1] R. Konaka, E. Kasahara, W. C. Dunlap, Irradiation of titanium dioxide generates both singlet oxygen and superoxide anion, *Free Radical Biology and Medicine*, 1999, 27, 294-300.
- [2] M. J. Zhou, J. Z. Li, Z. F. Ye, C. C. Ma, H. Q. Wang, P. W. Huo, W. D. Shi, Y. S. Yan, Transfer Charge and Energy of  $\text{Ag}@ \text{CdSe}$  QDs-rGO Core-Shell Plasmonic Photocatalyst for Enhanced Visible Light Photocatalytic Activity, *ACS applied materials & interfaces*, 2015, 7, 28231-28243.
